# Supplementary material for: Photosynthetic enhancement, lifespan extension, and leaf area enlargement in flag leaves increased the yield of transgenic rice plants overproducing Rubisco under sufficient N fertilization
Source: Research Square preprint supplement (doi:10.21203/rs.3.rs-1139533/v1), 2021-12-06
Supplement: Supplementary file 1 [file 4754e398d074be7102e25358.pdf]

## Supplementary File 4

Table S2

### Climatic conditions in 2021

| Year | May           |      |      | June |      |      | July |      |      | Aug. |      |      | Sep. |      |      | Oct. |       |
|------|---------------|------|------|------|------|------|------|------|------|------|------|------|------|------|------|------|-------|
|      | Big           | Mid. | End  | Big. | Mid.  |
| A.v. | Temp. (°C)    |      |      |      |      |      |      |      |      |      |      |      |      |      |      |      |       |
|      | 12.5          | 13.9 | 15.7 | 16.9 | 17.9 | 19.3 | 20.5 | 21.5 | 22.6 | 23.4 | 22.9 | 22.1 | 21.1 | 19.5 | 17.2 | 15.3 | 13.3  |
| 2021 | Sunshine (hr) |      |      |      |      |      |      |      |      |      |      |      |      |      |      |      |       |
|      | 61.0          | 61.1 | 66.2 | 58.6 | 45.1 | 42.2 | 38.6 | 38.1 | 42.1 | 46.4 | 41.5 | 40.4 | 37.8 | 38.0 | 41.9 | 42.4 | 45.4+ |
| 2021 | Temp. (°C)    |      |      |      |      |      |      |      |      |      |      |      |      |      |      |      |       |
|      | 13.1          | 16.1 | 16.0 | 19.0 | 20.2 | 19.6 | 20.2 | 24.1 | 24.2 | 26.4 | 19.9 | 24.0 | 18.5 | 19.6 | 18.5 | 17.8 | 13.8  |
| 2021 | Sunshine (hr) |      |      |      |      |      |      |      |      |      |      |      |      |      |      |      |       |
|      | 78.5          | 54.8 | 66.6 | 74.2 | 44.6 | 42.9 | 5.3  | 68.6 | 41.2 | 53.9 | 14.4 | 35.9 | 28.6 | 44.6 | 54.6 | 39.0 | 17.3  |

Climatic conditions at Kawatabi Field Center (38°44' N, 140°45' E, at 140-m altitude) from May to October 2021. This covers the rice cultivation period in the experimental paddy field. For “Temp.,” yellow and light blue indicate a change in the average temperature of >1.0°C or <−1.0°C, respectively. For “Sunshine,” yellow and light blue highlights show a period with >120% or <80% of the average sunshine duration, respectively. Gray highlights show a temperature within 1°C of the average temperature and a sunshine duration of 80%–120% of the average. Data on the average weather over the past 30 years at Kawatabi Field Center, Miyagi Prefecture, Japan, are available on the Japan Meteorological Agency (JMA) website (JMA, <http://www.data.jma.go.jp/gmd/risk/obsdl/index.php>). The abbreviations stand as follows: “A.v.,” average, “Temp.,” temperature.
