# Supplementary material for: Photosynthetic enhancement, lifespan extension, and leaf area enlargement in flag leaves increased the yield of transgenic rice plants overproducing Rubisco under sufficient N fertilization
Source: Research Square preprint supplement (doi:10.21203/rs.3.rs-1139533/v1), 2021-12-06
Supplement: Supplementary file 2 [file 68a14f260854af5852505b42.pdf]

### Supplementary File 3

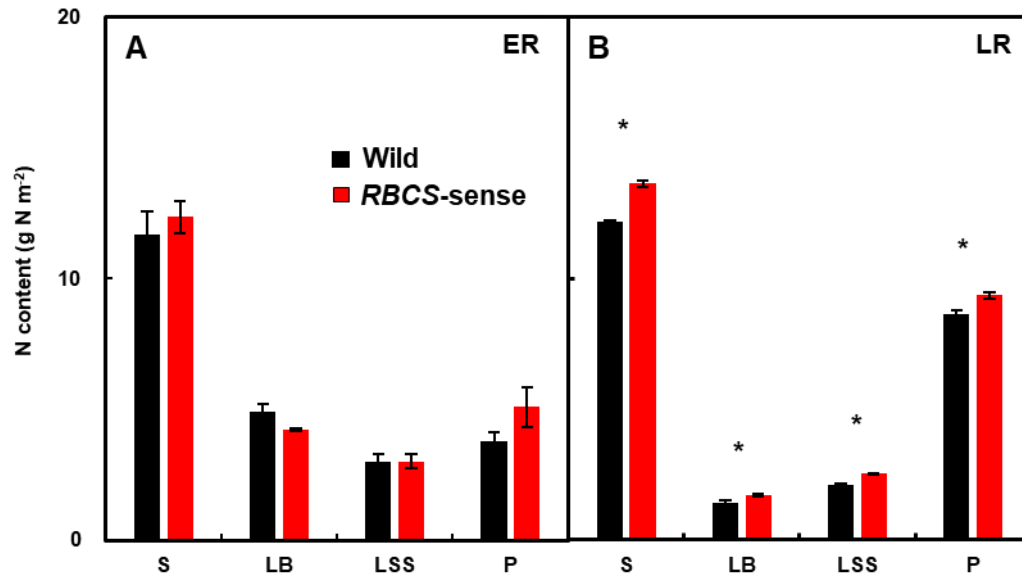

**Fig. S2** N contents of above-ground sections (shoots), leaf blades, sheaths and stems, and panicles on 10 DAH in early ripening (A) and 49 DAH in the late ripening stages (B) in the plots applied with 15 g N m<sup>-2</sup> fertilizer. Mean values  $\pm$  the standard error of three independent plots are indicated. \* $p < 0.05$  between the wild-type and *RBCS-sense* rice plants using Student's *t*-test. The wild-type and *RBCS-sense* rice plants are shown by black and red bars, respectively. The abbreviations stand as follows: "ER"; early ripening stage, "LB"; leaf blades, "LSS"; leaf sheaths and stems, "LR"; late ripening stage, "P"; panicles, "*RBCS-sense*"; transgenic rice plants overproducing Rubisco, "S"; shoots (above-ground sections), "Wild"; wild-type rice plants.
