# Supplementary material for: Photosynthetic enhancement, lifespan extension, and leaf area enlargement in flag leaves increased the yield of transgenic rice plants overproducing Rubisco under sufficient N fertilization
Source: Research Square preprint supplement (doi:10.21203/rs.3.rs-1139533/v1), 2021-12-06
Supplement: Supplementary file 3 [file 7510fb74412dc40e67972ae7.pdf]

## Supplementary File 1

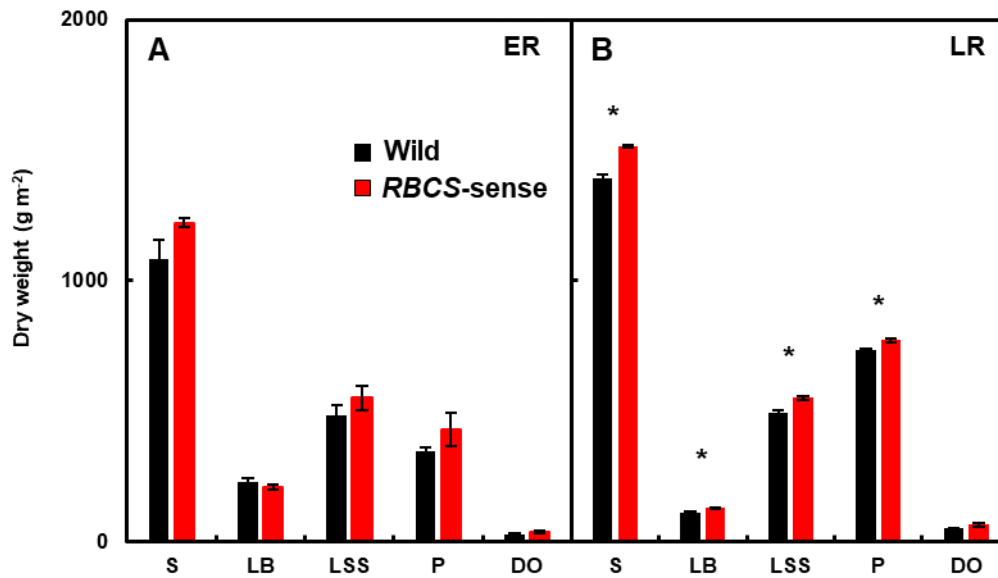

**Fig. S1** Stem or panicle number of the wild-type and *RBCS-sense* the rice plants at 10 DAH in early and 49 DAH in late ripening stages in plots applied with 15 g N m<sup>-2</sup> fertilizer. Mean values  $\pm$  the standard error of three independent plots, and those of stem numbers at an early ripening and panicle numbers at late ripening stages are shown. \* $p < 0.05$  between the wild-type and *RBCS-sense* rice plants using Student's *t*-test. The abbreviations stand as follows: "ER"; early ripening stage, "LR"; late-ripening stage, "*RBCS-sense*"; transgenic rice plants overproducing Rubisco, "Wild"; wild-type rice plants.
