# Supplementary material for: Photosynthetic enhancement, lifespan extension, and leaf area enlargement in flag leaves increased the yield of transgenic rice plants overproducing Rubisco under sufficient N fertilization
Source: Research Square preprint supplement (doi:10.21203/rs.3.rs-1139533/v1), 2021-12-06
Supplement: Supplementary file 4 [file e273bf8d87ae846137768155.pdf]

## Supplementary File 2

**Table S1**

**Stem or panicle number of the wild-type and *RBCS*-sense the rice plants at 10 DAH in early and 49 DAH in late ripening stages in plots applied with 15 g N m<sup>-2</sup> fertilizer.**

| Line               | Stem or panicle numbers (m <sup>-2</sup> ) |          |
|--------------------|--------------------------------------------|----------|
|                    | ER                                         | LR       |
| Wild               | 442 ± 35                                   | 407 ± 13 |
| <i>RBCS</i> -sense | 436 ± 23                                   | 398 ± 8  |

Mean values ± the standard error of three independent plots, and those of stem numbers at an early ripening and panicle numbers at late ripening stages are shown. Statistical analysis was conducted by Student's *t*-test ( $p < 0.05$ ). The abbreviations stand as follows: "ER"; early ripening stage, "LR"; late-ripening stage, "*RBCS*-sense"; transgenic rice plants overproducing Rubisco, "Wild"; wild-type rice plants.
